# Supplementary material for: Fibroblast growth factor receptor-1 mediates internalization of pathogenic spotted fever rickettsiae into host endothelium
Source: PubMed Central journal article supplement (PMC5555671; doi:10.1371/journal.pone.0183181), 2017-08-14
Supplement: pone.0183181.s001.pdf [file pone.0183181.s001.pdf]

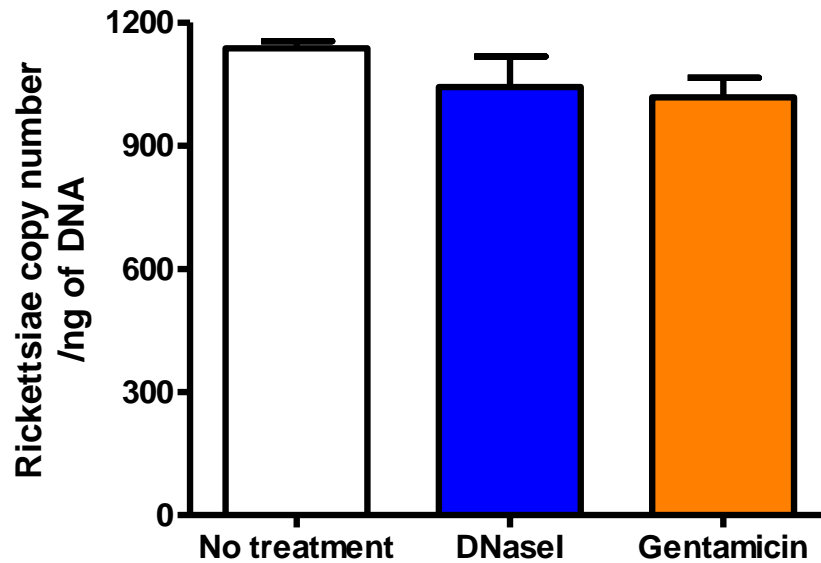

**S1 Fig: Effect of DNaseI and Gentamicin on rickettsial internalization:** *R. rickettsii*-infected HMECs were incubated with DNase1 (1U/ml) or gentamicin (100 µg/ml) for 30 minutes to remove any extracellular bacteria prior to the collection of infected cells for isolation of DNA and rickettsiae copy number was measured. The data represent mean  $\pm$  SEM of three separate experiments.
