# Supplementary material for: Fibroblast growth factor receptor-1 mediates internalization of pathogenic spotted fever rickettsiae into host endothelium
Source: PubMed Central journal article supplement (PMC5555671; doi:10.1371/journal.pone.0183181), 2017-08-14
Supplement: pone.0183181.s003.pdf [file pone.0183181.s003.pdf]

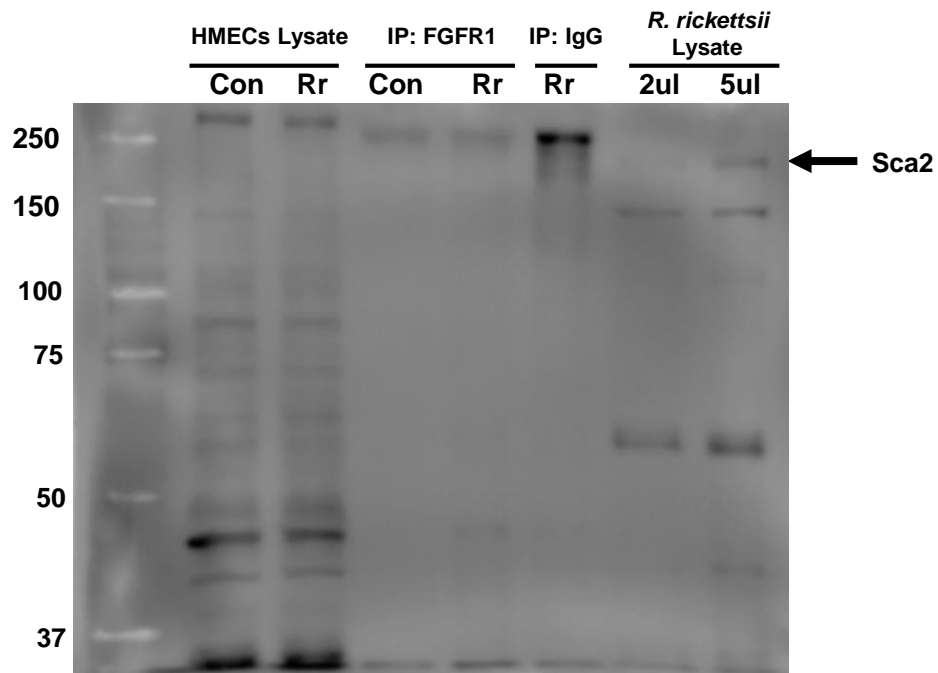

**S3 Fig: Lack of Sca2 association with FGFR1:** FGFR1 was immunoprecipitated (IP) from the lysates of *R. rickettsii*-infected ECs using an FGFR1-specific antibody and samples were subjected to SDS-PAGE and Western blotting using Sca2 antiserum (1:100 dilution). Mouse IgG was used as control. A representative blot is shown.
