# Supplementary material for: Fibroblast growth factor receptor-1 mediates internalization of pathogenic spotted fever rickettsiae into host endothelium
Source: PubMed Central journal article supplement (PMC5555671; doi:10.1371/journal.pone.0183181), 2017-08-14

Figure 2C

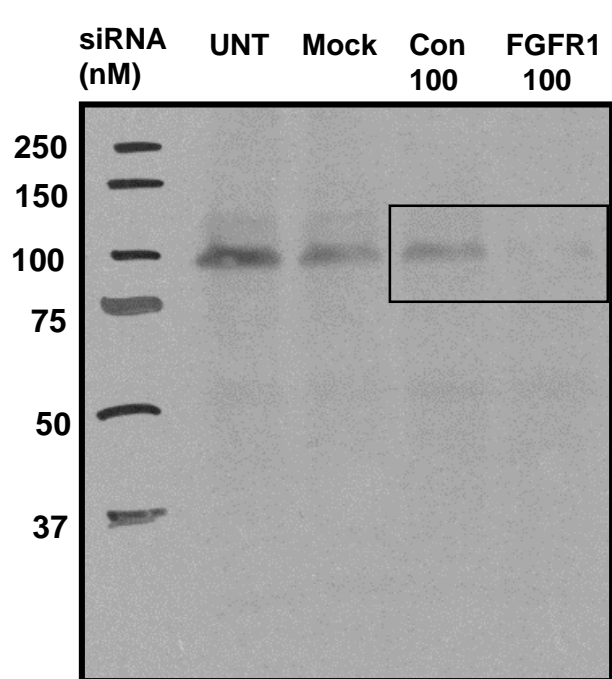

FGFR1

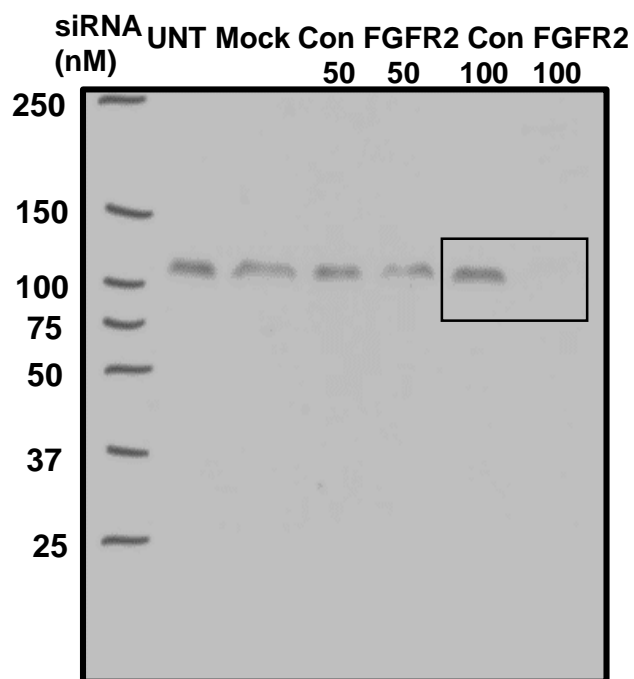

FGFR2

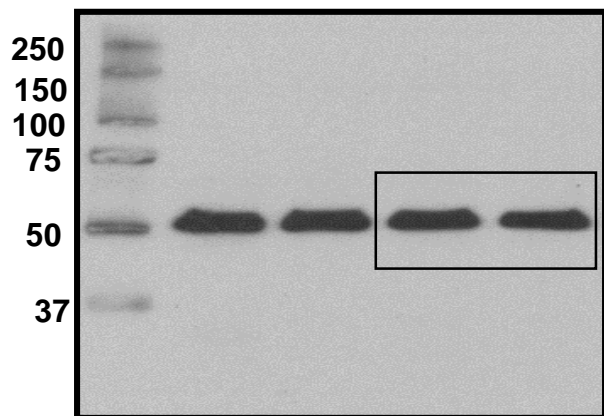

$\alpha$ -Tubulin

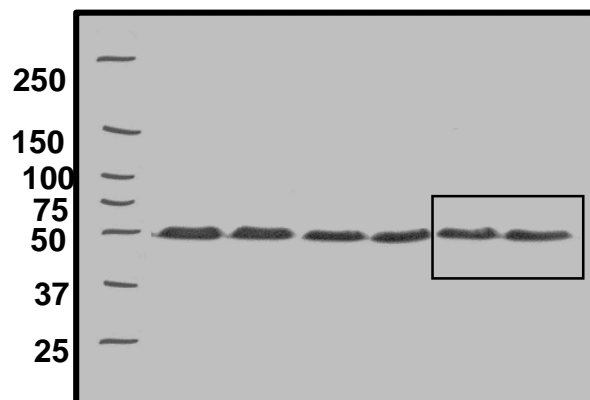

$\alpha$ -Tubulin

Figure 3

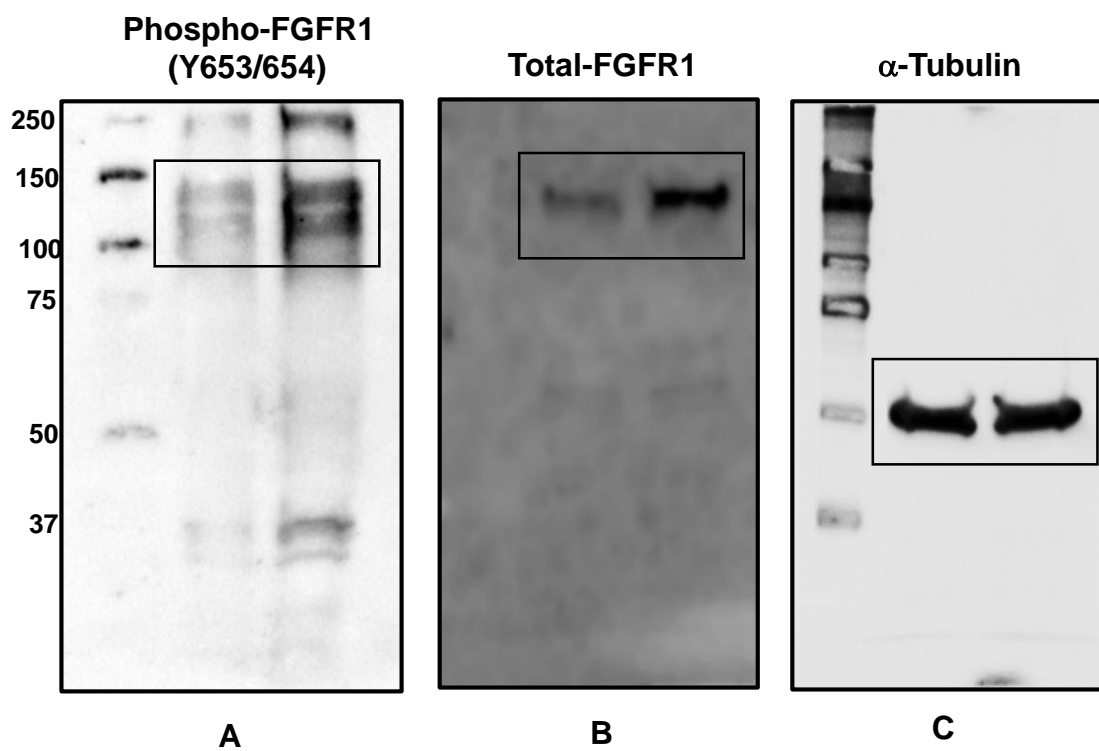

Figure 4C

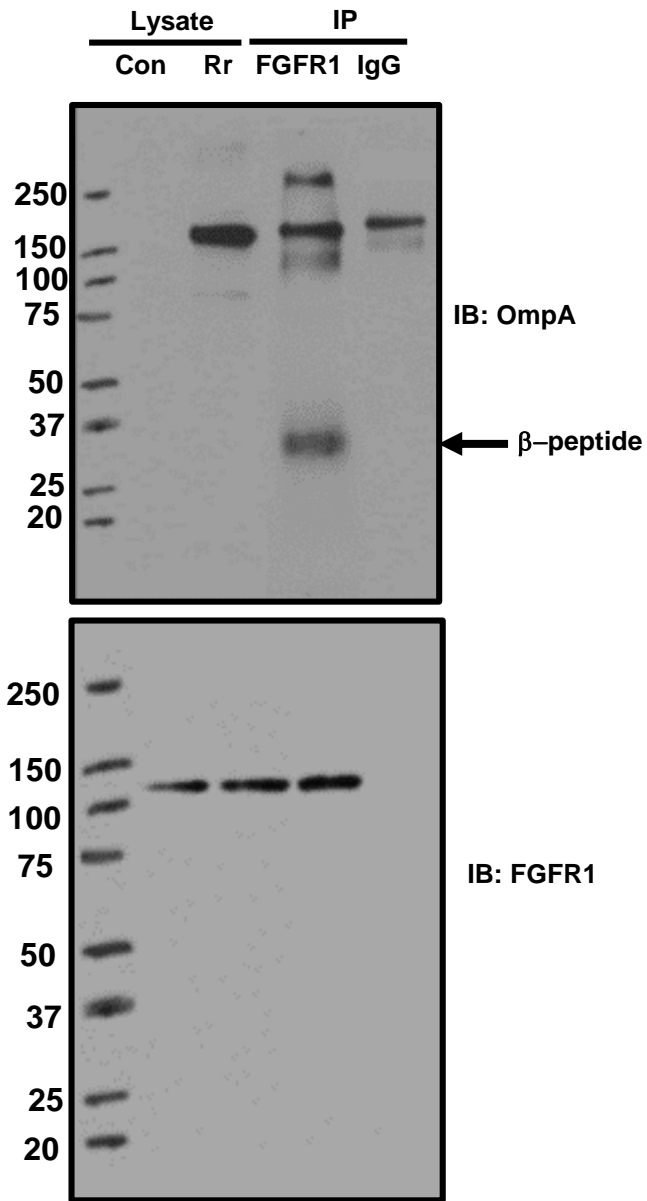

Figure 5A

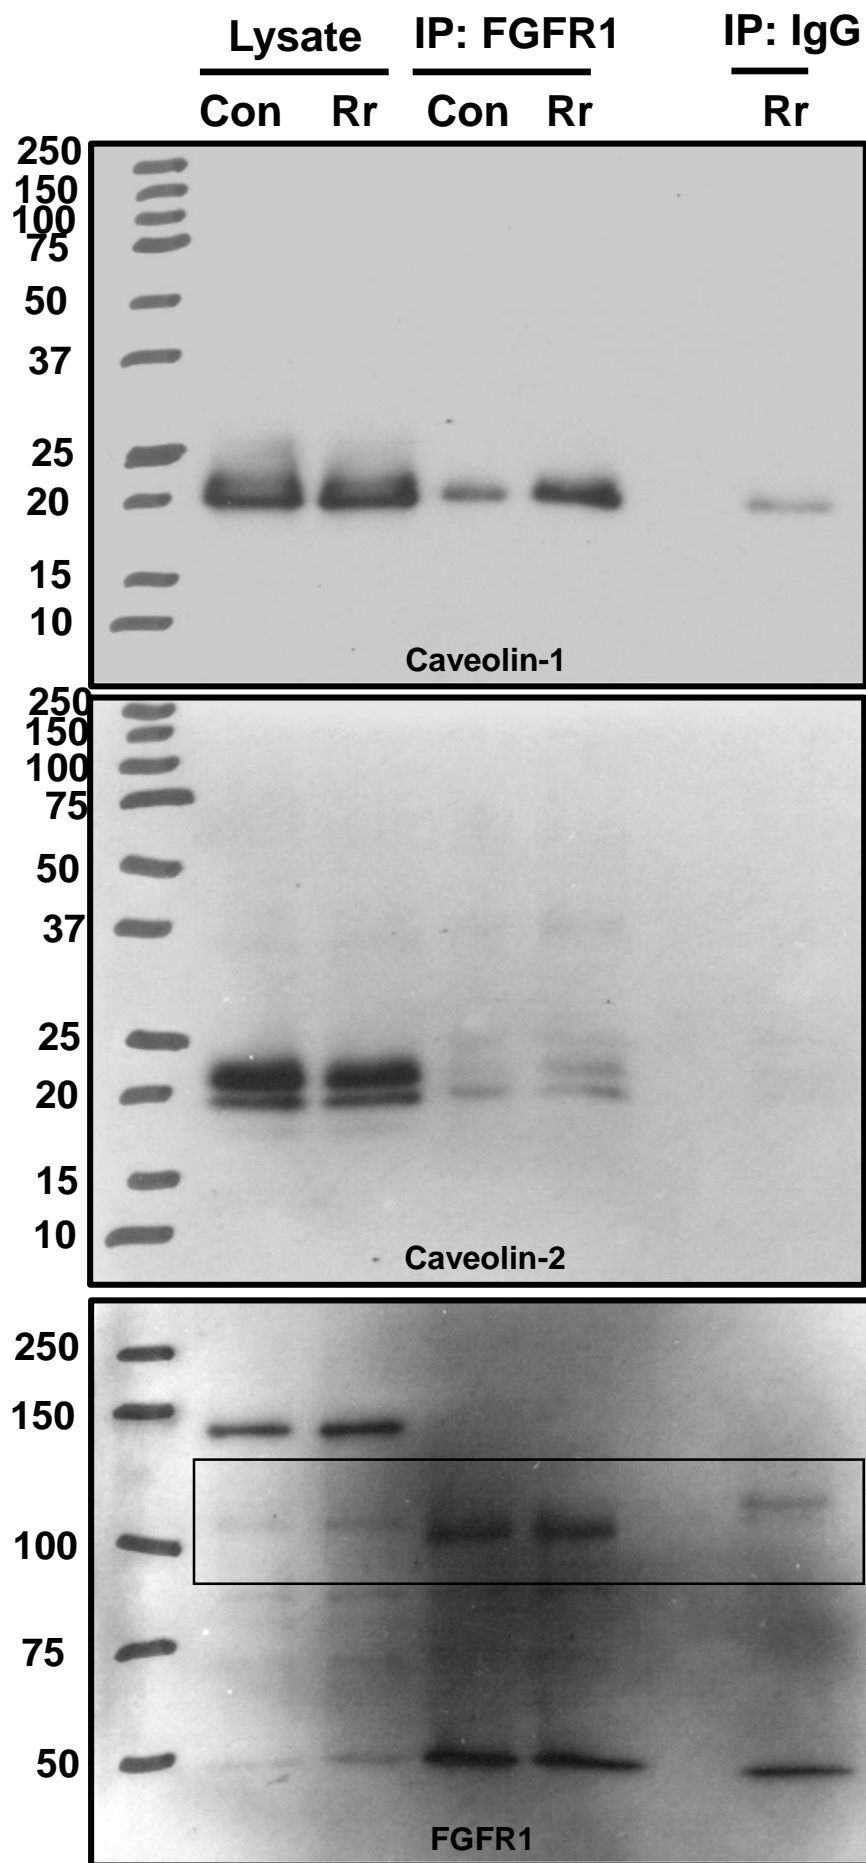

Figure 5C

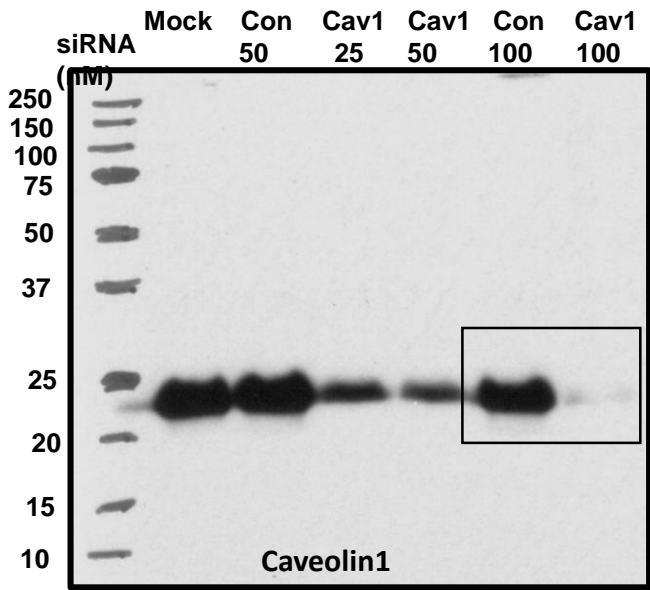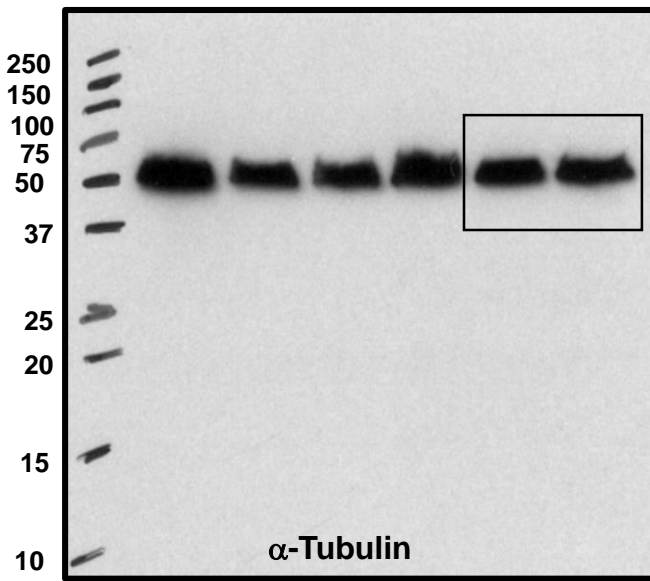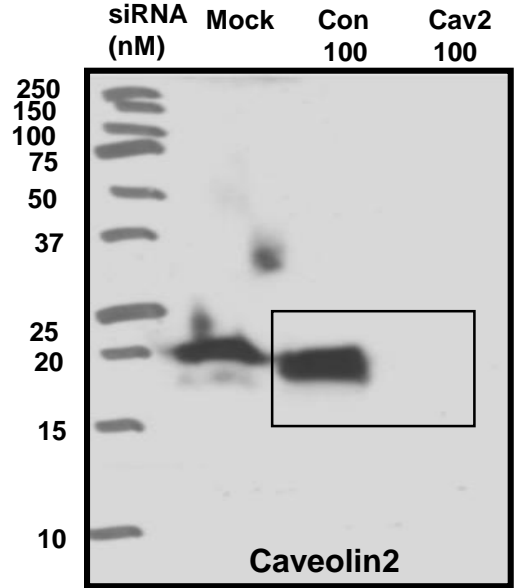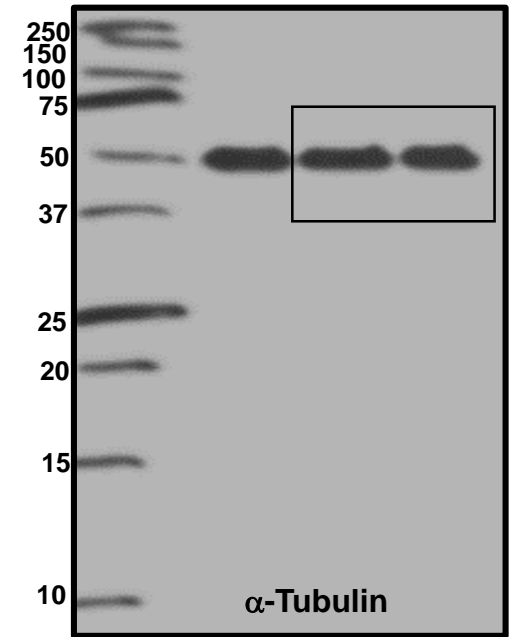

Supplement: pone.0183181.s004.pdf [file pone.0183181.s004.pdf]
